# Supplementary material
Source: Springer Nature journal article supplement (https://www.springermedizin.de/resource/supplementary/12876_2013_1241_MOESM1_ESM.pdf/9438306)

ROC Curve

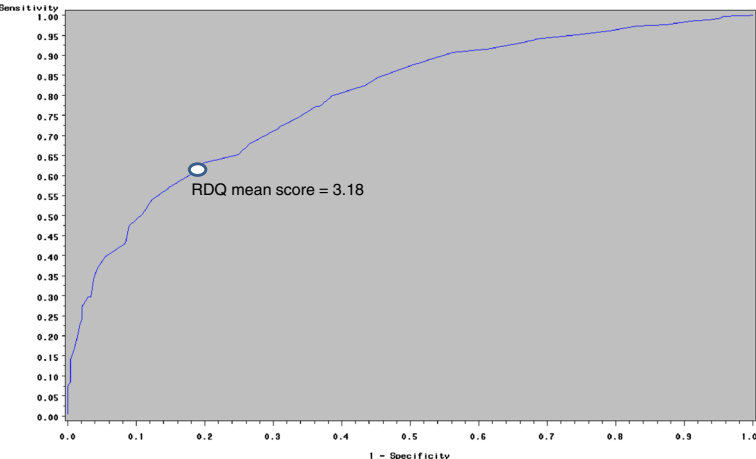

Supplement: MOESM1 [file 9438306]
